# Supplementary material for: Bifidobacterium Is Enriched in Gut Microbiome of Kashmiri Women with Polycystic Ovary Syndrome
Source: Genes (Basel). 2022 Feb 18;13(2):379. doi: 10.3390/genes13020379 (PMC8871983; doi:10.3390/genes13020379)
Supplement: Supplementary file 1 [file genes-13-00379-s001.zip]

Archive with 8 entries (8 files):
- FigureS1A.html
- __MACOSX/._FigureS1A.html
- FigureS1B.html
- __MACOSX/._FigureS1B.html
- FigureS2.pdf
- __MACOSX/._FigureS2.pdf
- Supplementary Tables S1-13.xlsx
- __MACOSX/._Supplementary Tables S1-13.xlsx
