# Supplementary material for: Bifidobacterium Is Enriched in Gut Microbiome of Kashmiri Women with Polycystic Ovary Syndrome
Source: Genes (Basel). 2022 Feb 18;13(2):379. doi: 10.3390/genes13020379 (PMC8871983; doi:10.3390/genes13020379)
Supplement: Supplementary file 1 [file genes-13-00379-s001.zip › Supplementary Tables S1-13.xlsx]

## Sheet: ST LEGENDS
ST1	Supplementary Table 1. Characteristics of the study sample.
ST2	Supplementary Table 2. Association results from MaAsLin between all the bacteria at family level and PCOS case-control status.
ST3	Supplementary Table 3. Association results from MaAsLin between all the bacteria at genus level and PCOS case-control status.
ST4	Supplementary Table 4. Association results from MaAsLin between all the bacteria at family level and follicle stimulating hormone (FSH) levels.
ST5	Supplementary Table 5. Association results from MaAsLin between all the bacteria at family level and lutenising hormone (LH) levels.
ST6	Supplementary Table 6. Association results from MaAsLin between all the bacteria at family level and lutenising hormone (LH) to follicle stimulating hormone (FSH) ratio (LH/FSH).
ST7	Supplementary Table 7. Association results from MaAsLin between all the bacteria at family level and testosterone (TESTO) levels.
ST8	Supplementary Table 8. Association results from MaAsLin between all the bacteria at genus level and follicle stimulating hormone (FSH) levels.
ST9	Supplementary Table 9. Association results from MaAsLin between all the bacteria at genus level and lutenising hormone (LH) to follicle stimulating hormone (FSH) ratio (LH/FSH).
ST10	Supplementary Table 10. Association results from MaAsLin between all the bacteria at genus level and luteinising hormone (LH) levels.
ST11	Supplementary Table 11. Association results from MaAsLin between all the bacteria at genus level and testosterone (TESTO) levels.
ST12	Supplementary Table 12. Association results from MaAsLin between PCOS associated bacteria at genus level and quantitative traits measured in the case control population
ST13	Supplementary Table 13. Association results from MaAsLin between PCOS associated bacteria at family level and quantitative traits measured in the case control population

## Sheet: ST1
Supplementary Table 1. Characteristics of the study sample.
	Cases (N=19)	Controls (N=20)	P-value*
	Mean (SD) or N[%]	Mean (SD) or N[%]
Anthropometrics and blood measurements
Age, years	23.9 (6.9)	21.1 (2.5)	0.093
Height, cm	155.6 (4.9)	151.5 (6.8)	0.037
Weight, kg	61.5 (8.9)	53.1 (7.5)	0.00286
BMI, kg/m2	25.4 (3.3)	23.2 (3.2)	0.041
Waist, cm	81.3 (10)	66.4 (4.7)	6e-07
Hip circumference, cm	92.2 (7.8)	75.9 (5.3)	3.63e-09
Waist-hip-ratio	0.9 (0.1)	0.9 (0)	0.73
Systolic blood pressure, mmHg	124.5 (9.7)	120.8 (6.1)	0.16
Diastolic blood pressure, mmHg	81.6 (7.6)	80.5 (3.9)	0.58
Luteinising hormone (LH), IU/L	5 (2.8)	4.3 (0.6)	0.28
Follicle stimulating hormone (FSH), IU/L	5.5 (1.6)	5.1 (1.2)	0.34
LH/FSH ratio	0.97 (0.70)	0.90 (0.28)	0.66
Testosterone (TESTO), ng/dL	56.8 (26.6)	49.6 (12.7)	0.28
Fasting blood glucose, mg/dL	114.2 (8.6)	106.1 (9.1)	0.00671
Blood glucose I hour, mg/dL	126 (11.8)	120 (24.3)	0.33
Blood glucose 2 hour, mg/dL	121.2 (10.7)	121.3 (22.3)	0.99
Total cholesterol, mg/dL	164.7 (31.8)	149.1 (26.9)	0.11
Triglycerides, mg/dL	205.9 (105.8)	144.3 (96.6)	0.065
High-density lipoprotein (HDL), mg/dL	39.6 (4.6)	41.8 (4.4)	0.14
Low-density lipoprotein (LDL), mg/dL	110.2 (8.4)	108.4 (9.5)	0.54
Bilirubin, mg/dL	1.2 (0.4)	1.3 (0.7)	0.89
Aspartate transaminase (AST), mg/dL	25.6 (10.3)	31.9 (7)	0.033
Alanine transaminase (ALT), mg/dL	27.6 (10)	25.7 (6.4)	0.46
Alkaline phosphatase (ALP), mg/dL	250.7 (60.2)	210 (39.6)	0.016
Total proteins	7.5 (0.3)	6.9 (1.3)	0.08
Albumin, g/dL	4.7 (0.5)	3.8 (0.6)	6.68e-06
Urea, mg/dL	24.3 (5.8)	21.1 (7)	0.13
Creatinine, mg/dL	0.8 (0.2)	0.5 (0.2)	1.58e-06
Uric acid, mg/dL	4.6 (1.3)	4.4 (1.6)	0.64
Calcium (Ca), mg/dL	9.4 (0.6)	9.4 (0.4)	0.84
Phosphorus (P), mg/dL	3.4 (0.4)	3.4 (0.5)	0.63
Sodium	140.3 (5.9)	137.4 (7.5)	0.18
Prolactin	15.7 (7.2)	10 (4.7)	0.00564
Thyroxine (T4), ug/dL	7.3 (2.3)	7.3 (1.5)	0.93
Thyroid stimulating hormone (TSH), mIU/L	4.6 (2)	3.2 (1.1)	0.00911
Lifestyle factors
Physical activity, yes	5 [26]	11 [55]	0.11
Daily calorie intake (kcal)	1610.5 (124.3)	1530 (130.2)	0.056
Non-vegetarian, yes	19 [100]	20 [100]	NA
Frequency of non-vegetarian meals/week
1	2 [16]	3 [15]	0.25
2	10 [53]	15 [75]
3	6 [32]	2 [10]
Eat breakfast, yes	19 [100]	20 [100]	NA
Eat mid morning meal, yes	7 [37]	8 [40]	1
Eat lunch, yes	19 [100]	20 [100]	NA
Eat at tea time, yes	19 [100]	18 [90]	0.49
Eat dinner, yes	19 [100]	20 [100]
Eat at bed time, yes	16 [84]	18 [90]	0.66
Eat or drink between main meals, yes	7 [37]	13 [65]	0.11
Number of meals between main meals
0	18 [95]	7 [35]	0.000136
1	1 [5]	13 [65]
Skip main meals, yes	15[79]	15 [75]	1
Which main meal do you skip?
I do not skip main meals	4 [21]	4 [20]	0.74
Breakfast	0 [0]	0 [0]
Mid morning meal	12 [63]	12 [60]
Lunch	0 [0]	0 [0]
Tea time meal	0 [0]	2 [10]
Dinner	0 [0]	0 [0]
Bed time meal	3 [16]	2[10]
PCOS-related
Age at menarche, years	13.3 (2.2)	12.2 (1.2)	0.063
Number of cycles per year	6.8 (1.9)	10.7 (1)	1.69e-09
H-score	7.3 (5.5)	0.4 (1.8)	6.03e-06
Menstrual cycle irregularity, yes	19 [100]	0 [0]	1.45e-11
Acanthosis nigricans, yes	5 [26]	0 [0]	0.02
Acne, yes	7 [37]	2 [10]	0.06
Alopecia, yes	9 [47]	4 [20]	0.1
Duration of hirsutism, years	1.8 (0.8)	0.1 (0.2)	1.87e-11
Family history of hirsutism, yes	3 [16]	2 [10]	0.66
Family history of menstrual disturbances, yes	5 [26]	2 [10]	0.24
Family history of T2D, yes	11 [58]	7 [35]	0.2
Stool sample collection and sequencing
Day of menstrual cycle at stool collection
Day 3	7 [37]	6 [30]	1
Day 4	5 [26]	6 [30]
Day 5	6 [32]	7 [35]
Day 6	1 [5]	1 [5]
Stool consistency
Sausage shaped with cracks on the surface	3 [16]	2 [10]	0.66
Sausage shaped and smooth soft stool	12 [63]	15 [75]
Solid clumpsy stool	3 [16]	1 [5]
Watery stool	1 [5]	2 [10]
Read depth, genus level	80434.6 (44927.2)	161279.9 (158861.1)	0.039
Read depth, family level	81547.8 (45539.7)	164695 (162499.2)	0.038
*P-value is from t-test for continuous traits and Fisher’s exact test for categorical traits.

## Sheet: ST2
Supplementary Table 2. Association results from MaAsLin between all the bacteria at family level and PCOS case-control status.
	Unadjusted				Adjusted for stool consistency, read depth, day of menstrual cycle at sample collection, age				Adjusted for stool consistency, read depth, day of menstrual cycle at sample collection, age, BMI
Feature	N	Coefficient	P-value	Q-value	N	Coefficient	P-value	Q-value	N	Coefficient	P-value	Q-value
Aerococcaceae	35	0.00728899	0.000914648	0.0365859	35	0.00722832	0.000418644	0.0821472	35	0.00633353	0.00211507	0.232775
Peptococcaceae	39	-0.0105808	0.00340654	0.0548062	39	-0.00962215	0.00492797	0.246398	39	-0.0102424	0.00484948	0.232775
Lactobacillaceae	39	0.0857627	0.00544643	0.0548062	39	0.0850466	0.00772859	0.306828	39	0.0833175	0.013703	0.349262
Bifidobacteriaceae	39	0.0956689	0.00548062	0.0548062	39	0.100392	0.00349324	0.232883	39	0.10304	0.00477746	0.232775
Erysipelotrichaceae	39	0.029532	0.0344647	0.254091	39	0.0286915	0.0445733	0.456802	39	0.0224314	0.123635	0.679583
Planococcaceae	39	-0.00125007	0.0477252	0.254091	39	-0.00129932	0.0559138	0.465948	39	-0.000941224	0.167952	0.679583
Veillonellaceae	39	0.0601744	0.0490367	0.254091	39	0.0659089	0.0347094	0.433868	39	0.0609199	0.0640664	0.679583
Porphyromonadaceae	39	0.0152529	0.0575812	0.254091	39	0.0164266	0.0513287	0.461323	39	0.0148628	0.0939774	0.679583
Coriobacteriaceae	39	0.0341193	0.0600999	0.254091	39	0.037991	0.0283033	0.404333	39	0.0399103	0.0304025	0.48644
Rivulariaceae	39	0.00468577	0.0635227	0.254091	39	0.0041043	0.113938	0.634225	39	0.00394772	0.152376	0.679583
Ruminococcaceae	39	0.0610248	0.0707828	0.257392	39	0.0649249	0.0456802	0.456802	39	0.0479765	0.141546	0.679583
Peptostreptococcaceae	38	0.0145136	0.0925495	0.304846	38	0.0127377	0.152452	0.63946	38	0.0130772	0.167855	0.679583
Xanthomonadaceae	39	-0.00593722	0.104505	0.304846	39	-0.00614128	0.0967088	0.586114	39	-0.00501643	0.192993	0.67967
Succinivibrionaceae	38	-0.0751878	0.106696	0.304846	38	-0.0624237	0.157525	0.642961	38	-0.0639945	0.173733	0.67967
Clostridiaceae	39	0.0231749	0.213324	0.568863	39	0.0255724	0.185836	0.671237	39	0.0238766	0.244752	0.721288
Enterobacteriaceae	39	-0.0161975	0.279512	0.673741	39	-0.0125775	0.415222	0.8064	39	-0.0146083	0.374061	0.787476
Heliobacteriaceae	39	-0.003149	0.28634	0.673741	39	-0.00309929	0.324535	0.772702	39	-0.00405835	0.221616	0.721288
Turicibacteraceae	37	0.00692315	0.333366	0.70993	37	0.00739507	0.291704	0.728449	37	0.00679207	0.362215	0.787476
Alcaligenaceae	39	-0.0135083	0.342099	0.70993	39	-0.0102113	0.408659	0.8064	39	-0.0175359	0.163214	0.679583
Chitinophagaceae	39	-0.000962409	0.354965	0.70993	39	-0.00142128	0.152933	0.63946	39	-0.0015929	0.132068	0.679583
Coprobacillaceae	39	-0.0140303	0.382569	0.712642	39	-0.0158341	0.328478	0.77289	39	-0.0142332	0.408399	0.811083
Prevotellaceae	39	-0.0513753	0.391953	0.712642	39	-0.0711773	0.250289	0.718864	39	-0.0993091	0.123237	0.679583
Paraprevotellaceae	39	-0.0155333	0.449098	0.730966	39	-0.0174036	0.416917	0.8064	39	-0.0234663	0.300272	0.740377
Desulfovibrionaceae	39	-0.00286061	0.452316	0.730966	39	-0.00275175	0.488029	0.817054	39	-0.00356969	0.396676	0.80194
Rhodobacteraceae	39	-0.00183687	0.456853	0.730966	39	-0.00309694	0.196669	0.671237	39	-0.00398165	0.114171	0.679583
Elusimicrobiaceae	20	-0.00069039	0.498775	0.767346	20	-0.000199537	0.826861	0.911319	20	-0.00011837	0.902994	0.95662
Bacteroidaceae	39	0.0128801	0.527295	0.777834	39	0.0172396	0.381522	0.788908	39	0.0138493	0.506705	0.855347
Flavobacteriaceae	39	-0.00360344	0.544484	0.777834	39	-0.00469428	0.442896	0.8064	39	-0.00682753	0.288225	0.740377
Bacillaceae	39	0.000609434	0.638552	0.818073	39	0.000215508	0.867395	0.927695	39	0.000406099	0.767271	0.922184
Phyllobacteriaceae	34	0.000455573	0.644178	0.818073	34	0.000278916	0.780684	0.911319	34	0.00033742	0.751978	0.916116
Lachnospiraceae	39	0.0143831	0.645542	0.818073	39	0.0103155	0.729904	0.890126	39	-0.00189974	0.95115	0.985326
Streptomycetaceae	39	0.00175553	0.698877	0.818073	39	0.000611369	0.895356	0.947467	39	-0.00196226	0.677993	0.869966
Caldilineaceae	39	-0.00168332	0.704241	0.818073	39	-0.00176556	0.693436	0.859314	39	-0.00323267	0.492388	0.855347
Odoribacteraceae	39	-0.00240892	0.711877	0.818073	39	4.58382e-05	0.994148	0.998089	39	-0.00153985	0.815546	0.922184
Sinobacteraceae	37	-0.000419204	0.715814	0.818073	37	-0.000808558	0.492571	0.817054	37	-0.000962399	0.442903	0.826893
Micrococcaceae	39	0.000141241	0.865473	0.961637	39	-0.000242139	0.76505	0.911319	39	-0.000392269	0.648352	0.869966
Comamonadaceae	39	0.000698076	0.922206	0.984578	39	0.00170872	0.82028	0.911319	39	-0.00114359	0.884036	0.947181
Sphingobacteriaceae	39	0.000961625	0.94137	0.984578	39	0.00641063	0.588647	0.833403	39	0.0066192	0.600412	0.869966
Microbacteriaceae	39	0.000357097	0.959963	0.984578	39	-0.000340295	0.963039	0.978828	39	-0.000310017	0.968413	0.989018
Streptococcaceae	38	-1.55729e-05	0.99816	0.99816	38	0.000716342	0.915137	0.959834	38	-0.00176676	0.801304	0.922184

## Sheet: ST3
Supplementary Table 3. Association results from MaAsLin between all the bacteria at genus level and PCOS case-control status.
	Unadjusted				Adjusted for stool consistency, read depth, day of menstrual cycle at sample collection, age				Adjusted for stool consistency, read depth, day of menstrual cycle at sample collection, age, BMI
Feature	N	Coefficient	P-value	Q-value	N	Coefficient	P-value	Q-value	N	Coefficient	P-value	Q-value
Sarcina	36	0.023	0.001	0.025	36	0.023	0.001	0.066	36	0.024	0.001	0.127
Alkalibacterium	35	0.007	0.001	0.025	35	0.007	0	0.066	35	0.006	0.002	0.145
Megasphaera	39	0.093	0.003	0.048	39	0.099	0.003	0.104	39	0.098	0.005	0.19
Collinsella	39	0.041	0.004	0.048	39	0.043	0.002	0.101	39	0.043	0.004	0.179
Paraprevotella	37	0.014	0.004	0.048	37	0.014	0.001	0.066	37	0.012	0.006	0.192
Lactobacillus	39	0.086	0.006	0.048	39	0.085	0.008	0.207	39	0.084	0.014	0.304
Bifidobacterium	39	0.096	0.006	0.048	39	0.1	0.004	0.115	39	0.103	0.005	0.19
Dysgonomonas	39	0.016	0.035	0.219	39	0.016	0.047	0.481	39	0.016	0.063	0.501
Erysipelothrix	39	0.017	0.036	0.219	39	0.018	0.022	0.342	39	0.016	0.058	0.475
Atopobium	36	0.02	0.038	0.219	36	0.019	0.042	0.481	36	0.019	0.057	0.475
Natronincola	38	0.016	0.049	0.256	38	0.017	0.016	0.298	38	0.016	0.031	0.456
Phascolarctobacterium	36	-0.003	0.058	0.28	36	-0.003	0.086	0.512	36	-0.004	0.033	0.456
Calothrix	39	0.005	0.066	0.294	39	0.004	0.116	0.582	39	0.004	0.155	0.576
Dorea	36	0.013	0.09	0.338	36	0.014	0.058	0.481	36	0.01	0.162	0.576
Eubacterium	38	0.024	0.092	0.338	38	0.022	0.132	0.582	38	0.013	0.376	0.755
Ruminococcus	39	0.032	0.093	0.338	39	0.035	0.053	0.481	39	0.029	0.121	0.576
Succinivibrio	38	-0.077	0.105	0.357	38	-0.064	0.152	0.589	38	-0.065	0.169	0.576
Stenotrophomonas	30	0.002	0.124	0.4	30	0.002	0.118	0.582	30	0.003	0.045	0.475
Faecalibacterium	39	0.041	0.15	0.454	39	0.04	0.182	0.62	39	0.021	0.467	0.797
Oscillospira	39	0.033	0.168	0.454	39	0.039	0.06	0.487	39	0.036	0.104	0.574
Parabacteroides	37	0.01	0.171	0.454	37	0.012	0.073	0.501	37	0.01	0.159	0.576
Anoxybacillus	29	-0.001	0.172	0.454	29	-0.001	0.268	0.69	29	-0.001	0.345	0.745
Pseudobutyrivibrio	39	0.007	0.207	0.523	39	0.006	0.261	0.687	39	0.003	0.601	0.871
Alkaliphilus	39	0.01	0.259	0.624	39	0.011	0.273	0.69	39	0.011	0.29	0.726
Heliorestis	39	-0.003	0.277	0.624	39	-0.003	0.314	0.7	39	-0.004	0.215	0.65
Oribacterium	38	0.008	0.281	0.624	38	0.008	0.271	0.69	38	0.006	0.462	0.797
Olsenella	25	-0.007	0.292	0.624	25	-0.005	0.378	0.726	25	-0.005	0.44	0.782
Clostridium	39	0.015	0.301	0.624	39	0.015	0.315	0.7	39	0.013	0.424	0.782
Sutterella	39	-0.014	0.336	0.633	39	-0.011	0.395	0.735	39	-0.018	0.155	0.576
Negativicoccus	38	-0.009	0.336	0.633	38	-0.008	0.394	0.735	38	-0.013	0.177	0.583
Turicibacter	37	0.007	0.338	0.633	37	0.007	0.3	0.7	37	0.007	0.371	0.755
Odoribacter	38	0.004	0.368	0.65	38	0.005	0.242	0.674	38	0.005	0.344	0.745
Catenibacterium	39	-0.015	0.37	0.65	39	-0.016	0.316	0.7	39	-0.015	0.396	0.765
Prevotella	39	-0.054	0.388	0.661	39	-0.074	0.252	0.687	39	-0.103	0.124	0.576
Paracoccus	30	0.001	0.42	0.683	30	0.001	0.693	0.881	30	0.001	0.337	0.745
Micrococcus	15	0	0.424	0.683	15	-0.001	0.325	0.713	15	0	0.41	0.775
Desulfovibrio	39	-0.002	0.469	0.716	39	-0.003	0.367	0.72	39	-0.004	0.257	0.694
Polaribacter	39	-0.003	0.469	0.716	39	-0.004	0.365	0.72	39	-0.006	0.213	0.65
Elusimicrobium	20	-0.001	0.493	0.733	20	0	0.814	0.928	20	0	0.891	0.975
Escherichia	39	-0.009	0.514	0.745	39	-0.006	0.678	0.88	39	-0.008	0.625	0.887
Slackia	39	0.006	0.542	0.75	39	0.008	0.419	0.755	39	0.009	0.4	0.769
Bacteroides	39	0.012	0.543	0.75	39	0.017	0.398	0.735	39	0.013	0.526	0.828
Bacillus	39	0.001	0.559	0.754	39	0	0.826	0.928	39	0	0.998	0.999
Chitinophaga	27	-0.001	0.609	0.803	27	-0.001	0.333	0.72	27	-0.001	0.476	0.797
Phyllobacterium	28	0	0.631	0.814	28	0	0.634	0.874	28	0	0.587	0.87
Mitsuokella	30	-0.006	0.67	0.842	30	-0.004	0.765	0.906	30	0	0.974	0.996
Caldilinea	39	-0.002	0.689	0.842	39	-0.002	0.674	0.88	39	-0.003	0.476	0.797
Veillonella	38	-0.002	0.697	0.842	38	-0.001	0.834	0.934	38	-0.004	0.357	0.745
Butyrivibrio	36	0.002	0.781	0.903	36	0.002	0.76	0.906	36	0.002	0.837	0.958
Roseburia	39	0.006	0.787	0.903	39	0.003	0.901	0.975	39	-0.006	0.758	0.93
Sphingobacterium	39	0.003	0.807	0.903	39	0.009	0.495	0.789	39	0.009	0.501	0.81
Flavobacterium	39	0.001	0.81	0.903	39	0.002	0.675	0.88	39	0.002	0.66	0.904
Lachnospira	39	-0.003	0.855	0.93	39	-0.005	0.699	0.882	39	-0.011	0.427	0.782
Coprococcus	39	0.002	0.878	0.93	39	0	0.969	0.989	39	-0.002	0.87	0.975
Streptococcus	38	-0.001	0.896	0.93	38	0	0.983	0.99	38	-0.003	0.712	0.928
Blautia	39	0.002	0.898	0.93	39	0.001	0.976	0.989	39	0	0.997	0.999
Dialister	23	0	0.96	0.977	23	0	0.658	0.88	23	0	0.763	0.931
Kitasatospora	39	0	0.988	0.988	39	-0.001	0.817	0.928	39	-0.004	0.443	0.782

## Sheet: ST4
Supplementary Table 4. Association results from MaAsLin between all the bacteria at family level and follicle stimulating hormone (FSH) levels.
	Unadjusted				Adjusted for stool consistency, read depth, day of menstrual cycle at sample collection, age				Adjusted for stool consistency, read depth, day of menstrual cycle at sample collection, age, BMI
Feature	N	Coefficient	P-value	Q-value	N	Coefficient	P-value	Q-value	N	Coefficient	P-value	Q-value
Erysipelotrichaceae	39	0.0127332	0.0111915	0.447658	39	0.0109899	0.0343523	0.590588	39	0.0096329	0.0497761	0.659689
Lactobacillaceae	39	0.0243875	0.0336531	0.47326	39	0.0231987	0.0556044	0.590588	39	0.0221538	0.0714964	0.659689
Streptomycetaceae	39	0.0033757	0.0354945	0.47326	39	0.00314404	0.060562	0.590588	39	0.00281153	0.0863677	0.659689
Elusimicrobiaceae	20	-0.000638084	0.0805905	0.805905	20	-0.000571167	0.077182	0.590588	20	-0.000551468	0.0939775	0.659689
Aerococcaceae	35	0.00132648	0.117512	0.888948	35	0.00102957	0.20531	0.75092	35	0.000834227	0.285492	0.856266
Bifidobacteriaceae	39	0.0189298	0.146126	0.888948	39	0.0164087	0.219924	0.75092	39	0.0158038	0.247412	0.836922
Micrococcaceae	39	-0.00042537	0.155566	0.888948	39	-0.000505729	0.0828085	0.590588	39	-0.000525441	0.077681	0.659689
Lachnospiraceae	39	0.0148776	0.186773	0.923128	39	0.0130298	0.233919	0.75092	39	0.0114027	0.297362	0.856266
Peptostreptococcaceae	38	0.00396404	0.211028	0.923128	38	0.00372463	0.23656	0.75092	38	0.00342606	0.282816	0.856266
Veillonellaceae	39	0.0127331	0.261195	0.923128	39	0.0138748	0.215439	0.75092	39	0.0131888	0.248088	0.836922
Coriobacteriaceae	39	0.00686189	0.307339	0.923128	39	0.00623655	0.345306	0.86954	39	0.0060955	0.367564	0.913267
Phyllobacteriaceae	34	0.000301013	0.400453	0.923128	34	0.000281892	0.438395	0.904155	34	0.000304718	0.412152	0.925659
Rivulariaceae	39	-0.000778874	0.405854	0.923128	39	-0.000837097	0.390032	0.902343	39	-0.000925446	0.350383	0.894843
Alcaligenaceae	39	0.00416015	0.422568	0.923128	39	0.00292817	0.503638	0.904155	39	0.00234228	0.594634	0.929521
Coprobacillaceae	39	0.00446744	0.44576	0.923128	39	0.00243967	0.686203	0.918278	39	0.00291933	0.63514	0.929521
Sinobacteraceae	37	-0.000308404	0.460803	0.923128	37	-0.000286232	0.496282	0.904155	37	-0.000276945	0.520237	0.929521
Bacteroidaceae	39	0.00535544	0.470088	0.923128	39	0.00489984	0.480304	0.904155	39	0.00471004	0.507382	0.929521
Paraprevotellaceae	39	-0.00480843	0.520426	0.923128	39	-0.00695964	0.356311	0.872599	39	-0.0071885	0.352152	0.894843
Streptococcaceae	38	0.00156565	0.523292	0.923128	38	0.00145656	0.557468	0.916385	38	0.00112216	0.653027	0.929521
Microbacteriaceae	39	-0.00146497	0.570896	0.923128	39	-0.00175875	0.508644	0.904155	39	-0.00166867	0.539889	0.929521
Sphingobacteriaceae	39	-0.00265522	0.576286	0.923128	39	-0.00460289	0.291277	0.832221	39	-0.00477035	0.285301	0.856266
Bacillaceae	39	-0.000243633	0.605998	0.923128	39	-0.000346843	0.465327	0.904155	39	-0.000335119	0.490729	0.929521
Peptococcaceae	39	0.000653423	0.638742	0.923128	39	0.000801312	0.547834	0.916385	39	0.000899379	0.508355	0.929521
Enterobacteriaceae	39	0.00250021	0.648853	0.923128	39	0.00270281	0.617001	0.918278	39	0.00304121	0.581599	0.929521
Flavobacteriaceae	39	0.000981874	0.650586	0.923128	39	0.000552053	0.803784	0.965786	39	0.000421714	0.852523	0.973027
Turicibacteraceae	37	0.00108943	0.677545	0.923128	37	0.000290102	0.910771	0.971564	37	0.000181885	0.94523	0.973037
Porphyromonadaceae	39	0.00119627	0.689554	0.923128	39	0.000958046	0.764916	0.943869	39	0.000550433	0.864652	0.973027
Planococcaceae	39	-9.16255e-05	0.69773	0.923128	39	-6.74517e-05	0.793656	0.965786	39	7.91484e-06	0.97383	0.984377
Caldilineaceae	39	0.00059946	0.7105	0.923128	39	4.10599e-05	0.980284	0.986674	39	-0.000150369	0.928697	0.973037
Prevotellaceae	39	0.00724376	0.741377	0.923128	39	0.00110065	0.96211	0.974289	39	-0.00183715	0.937333	0.973037
Rhodobacteraceae	39	-0.000289161	0.748492	0.923128	39	-0.000595676	0.503163	0.904155	39	-0.000712967	0.426948	0.929521
Odoribacteraceae	39	-0.000728808	0.759039	0.923128	39	-0.00116562	0.609826	0.918278	39	-0.00134414	0.563657	0.929521
Heliobacteriaceae	39	0.000288242	0.790214	0.923128	39	0.000140157	0.901809	0.971564	39	0.000110317	0.924435	0.973037
Desulfovibrionaceae	39	-0.000342954	0.805247	0.923128	39	-0.000663784	0.641274	0.918278	39	-0.00067489	0.643817	0.929521
Succinivibrionaceae	38	0.00371023	0.829913	0.923128	38	0.00748388	0.644461	0.918278	38	0.00903861	0.583375	0.929521
Ruminococcaceae	39	-0.00237976	0.849879	0.923128	39	-0.00684367	0.5705	0.9182	39	-0.00982449	0.398722	0.922662
Comamonadaceae	39	0.00043456	0.86741	0.923128	39	0.000426414	0.878412	0.971564	39	-4.73856e-06	0.998644	0.998644
Chitinophagaceae	39	-5.72127e-05	0.880658	0.923128	39	-0.000219034	0.554183	0.916385	39	-0.000216784	0.567684	0.929521
Clostridiaceae	39	0.000860762	0.900049	0.923128	39	-0.000470683	0.948296	0.974014	39	-0.00112161	0.8792	0.973027
Xanthomonadaceae	39	7.36218e-05	0.956703	0.956703	39	0.000426304	0.757886	0.943869	39	0.000646624	0.640132	0.929521

## Sheet: ST5
Supplementary Table 5. Association results from MaAsLin between all the bacteria at family level and lutenising hormone (LH) levels.
	Unadjusted				Adjusted for stool consistency, read depth, day of menstrual cycle at sample collection, age				Adjusted for stool consistency, read depth, day of menstrual cycle at sample collection, age, BMI
Feature	N	Coefficient	P-value	Q-value	N	Coefficient	P-value	Q-value	N	Coefficient	P-value	Q-value
Veillonellaceae	39	-0.0214266	0.0606966	0.978895	39	-0.0287288	0.0185873	0.590198	39	-0.0281951	0.023242	0.636029
Alcaligenaceae	39	0.00931203	0.0875811	0.978895	39	0.00540527	0.269271	0.752053	39	0.0060863	0.213075	0.785014
Phyllobacteriaceae	34	-0.000435388	0.177337	0.978895	34	-0.000421041	0.301497	0.770137	34	-0.000443848	0.285193	0.800607
Bacteroidaceae	39	-0.00898278	0.258401	0.978895	39	-0.0154837	0.0411742	0.590198	39	-0.0154115	0.0466821	0.636029
Paraprevotellaceae	39	-0.00777443	0.30883	0.978895	39	-0.0133514	0.11071	0.590451	39	-0.0134041	0.117272	0.684084
Aerococcaceae	35	0.00083539	0.318637	0.978895	35	-8.29478e-05	0.928592	0.992569	35	0.000121839	0.890437	0.98107
Coprobacillaceae	39	0.00595806	0.341738	0.978895	39	0.00238564	0.725392	0.941049	39	0.00198865	0.773547	0.976819
Lactobacillaceae	39	-0.0119915	0.343284	0.978895	39	-0.0219765	0.109859	0.590451	39	-0.0208635	0.133468	0.701023
Bifidobacteriaceae	39	-0.0105871	0.45446	0.978895	39	-0.0246184	0.0983664	0.590198	39	-0.0240726	0.112904	0.672618
Desulfovibrionaceae	39	-0.00104918	0.476903	0.978895	39	-0.00209281	0.18602	0.720077	39	-0.00211828	0.190416	0.77688
Sinobacteraceae	37	0.000306109	0.497801	0.978895	37	0.000587244	0.210436	0.748918	37	0.000580883	0.225374	0.791535
Planococcaceae	39	-0.000161921	0.506895	0.978895	39	-0.00010999	0.704257	0.941049	39	-0.000185492	0.49154	0.90894
Elusimicrobiaceae	20	-0.000252759	0.511934	0.978895	20	1.30439e-05	0.972062	0.992569	20	-1.49922e-05	0.968363	0.983136
Comamonadaceae	39	0.00181146	0.513618	0.978895	39	0.00131865	0.673551	0.941049	39	0.00175968	0.572832	0.932517
Peptococcaceae	39	-0.000969513	0.517329	0.978895	39	-0.00105345	0.481755	0.875119	39	-0.0011487	0.451046	0.90894
Bacillaceae	39	-0.000285242	0.566817	0.978895	39	-0.000330744	0.53626	0.888474	39	-0.000351693	0.519412	0.914826
Erysipelotrichaceae	39	0.00288351	0.583895	0.978895	39	-0.00220593	0.715063	0.941049	39	-0.000742165	0.896108	0.98107
Ruminococcaceae	39	0.00692458	0.604771	0.978895	39	-0.00534774	0.69376	0.941049	39	-0.00263199	0.84118	0.98107
Enterobacteriaceae	39	-0.002644	0.649249	0.978895	39	-0.00227	0.70897	0.941049	39	-0.00258293	0.676926	0.961012
Caldilineaceae	39	0.000780137	0.653367	0.978895	39	-0.000759701	0.68385	0.941049	39	-0.000582748	0.757098	0.97242
Lachnospiraceae	39	0.00481975	0.692964	0.978895	39	-0.0025956	0.834752	0.965974	39	-0.000842183	0.945792	0.982394
Succinivibrionaceae	38	-0.00690448	0.707153	0.978895	38	-0.0095906	0.598722	0.910869	38	-0.0110966	0.548244	0.929699
Xanthomonadaceae	39	0.000498279	0.730794	0.978895	39	0.00100392	0.517432	0.887026	39	0.00080939	0.601828	0.937045
Sphingobacteriaceae	39	0.00164443	0.747241	0.978895	39	-0.00344167	0.484962	0.875119	39	-0.00339482	0.500388	0.90894
Rivulariaceae	39	0.0002924	0.769487	0.978895	39	0.000638758	0.560898	0.888769	39	0.000718929	0.519491	0.914826
Flavobacteriaceae	39	-0.000661608	0.776541	0.978895	39	-0.00219263	0.377412	0.862749	39	-0.00208435	0.410387	0.90894
Streptococcaceae	38	-0.000740868	0.78007	0.978895	38	-0.00252125	0.36466	0.862749	38	-0.00220472	0.429577	0.90894
Coriobacteriaceae	39	-0.00200711	0.782846	0.978895	39	-0.00824731	0.26569	0.752053	39	-0.00811237	0.283858	0.800607
Streptomycetaceae	39	0.000440968	0.799794	0.978895	39	5.99075e-05	0.975322	0.992569	39	0.000433128	0.818113	0.98107
Micrococcaceae	39	-8.23327e-05	0.801191	0.978895	39	-0.00024143	0.470165	0.871748	39	-0.000233331	0.494366	0.90894
Porphyromonadaceae	39	-0.000631622	0.838993	0.978895	39	-0.00216688	0.546608	0.888769	39	-0.00178296	0.622051	0.941483
Heliobacteriaceae	39	-0.00022749	0.844886	0.978895	39	-0.000485756	0.703424	0.941049	39	-0.000460548	0.723911	0.966329
Prevotellaceae	39	-0.00432395	0.854255	0.978895	39	-0.0174206	0.502136	0.877726	39	-0.0147681	0.572268	0.932517
Chitinophagaceae	39	7.16929e-05	0.859458	0.978895	39	-0.000113204	0.786159	0.960458	39	-0.000120263	0.777966	0.976819
Turicibacteraceae	37	-0.000447111	0.872423	0.978895	37	-0.0029561	0.305821	0.770137	37	-0.00288281	0.328076	0.850568
Rhodobacteraceae	39	0.000119187	0.902099	0.978895	39	-0.00022018	0.826333	0.96494	39	-0.000118638	0.906687	0.98107
Peptostreptococcaceae	38	-0.000383723	0.910653	0.978895	38	-0.00221738	0.534137	0.888474	38	-0.00189576	0.598985	0.937045
Odoribacteraceae	39	0.000201692	0.937121	0.978895	39	-0.00158475	0.536786	0.888474	39	-0.00144965	0.578969	0.937045
Microbacteriaceae	39	0.000152814	0.954422	0.978895	39	-0.000755058	0.80133	0.961596	39	-0.000879674	0.773879	0.976819
Clostridiaceae	39	0.000119353	0.98712	0.98712	39	-0.00471656	0.562272	0.888769	39	-0.00415074	0.615519	0.937045

## Sheet: ST6
Supplementary Table 6. Association results from MaAsLin between all the bacteria at family level and lutenising hormone (LH) to follicle stimulating hormone (FSH) ratio (LH/FSH).
	Unadjusted				Adjusted for stool consistency, read depth, day of menstrual cycle at sample collection, age				Adjusted for stool consistency, read depth, day of menstrual cycle at sample collection, age, BMI
Feature	N	Coefficient	P-value	Q-value	N	Coefficient	P-value	Q-value	N	Coefficient	P-value	Q-value
Lactobacillaceae	39	-0.0939141	0.058769	0.988368	39	-0.122069	0.0172119	0.541121	39	-0.118585	0.0219913	0.595843
Veillonellaceae	39	-0.0721606	0.135746	0.988368	39	-0.0919037	0.051826	0.541121	39	-0.0898006	0.0614886	0.595843
Bacteroidaceae	39	-0.0435803	0.168651	0.988368	39	-0.0631093	0.0285718	0.541121	39	-0.0628295	0.0326488	0.595843
Bifidobacteriaceae	39	-0.0715572	0.203645	0.988368	39	-0.107712	0.0565588	0.54668	39	-0.105888	0.065606	0.595843
Rivulariaceae	39	0.00459517	0.25265	0.988368	39	0.00539304	0.193878	0.68833	39	0.00568755	0.176561	0.752523
Enterobacteriaceae	39	-0.0233142	0.316553	0.988368	39	-0.0248478	0.28088	0.747807	39	-0.0260427	0.266585	0.792386
Alcaligenaceae	39	0.0220636	0.318127	0.988368	39	0.00713622	0.704982	0.927248	39	0.00927053	0.622773	0.938887
Peptostreptococcaceae	38	-0.013551	0.323506	0.988368	38	-0.018545	0.168308	0.68833	38	-0.0175491	0.196787	0.754799
Peptococcaceae	39	-0.00528496	0.376892	0.988368	39	-0.00476864	0.403688	0.87109	39	-0.0050908	0.380432	0.880339
Paraprevotellaceae	39	-0.0256563	0.404558	0.988368	39	-0.0394508	0.221041	0.73551	39	-0.0394532	0.230645	0.792386
Coprobacillaceae	39	0.019841	0.429766	0.988368	39	0.0104431	0.687174	0.921351	39	0.00910982	0.729597	0.948005
Odoribacteraceae	39	0.00746393	0.464354	0.988368	39	0.00362976	0.711626	0.927248	39	0.00418377	0.674935	0.947958
Sinobacteraceae	37	0.00125019	0.488554	0.988368	37	0.00161941	0.368784	0.82718	37	0.00158924	0.387339	0.881889
Aerococcaceae	35	0.00242311	0.513203	0.988368	35	-0.000265377	0.940165	0.989137	35	0.000423878	0.900021	0.967678
Flavobacteriaceae	39	-0.0060386	0.516184	0.988368	39	-0.0110083	0.243798	0.747807	39	-0.0106588	0.267598	0.792386
Streptococcaceae	38	-0.00677473	0.522087	0.988368	38	-0.0119558	0.258689	0.747807	38	-0.0109018	0.304131	0.797643
Desulfovibrionaceae	39	-0.00353256	0.549802	0.988368	39	-0.00618337	0.309059	0.752564	39	-0.0062416	0.314582	0.797643
Coriobacteriaceae	39	-0.0153279	0.598394	0.988368	39	-0.0323217	0.253192	0.747807	39	-0.031836	0.26994	0.792386
Streptomycetaceae	39	-0.00359101	0.614092	0.988368	39	-0.00507434	0.491097	0.881348	39	-0.00387061	0.589312	0.938887
Chitinophagaceae	39	0.00079264	0.625551	0.988368	39	0.000392435	0.805524	0.957058	39	0.000377114	0.816731	0.967678
Turicibacteraceae	37	-0.00528026	0.637998	0.988368	37	-0.0122621	0.265375	0.747807	37	-0.0120106	0.284684	0.797114
Planococcaceae	39	0.000432528	0.665383	0.988368	39	0.000628618	0.569512	0.900951	39	0.000385351	0.708697	0.948005
Prevotellaceae	39	-0.0378684	0.687467	0.988368	39	-0.0696775	0.482039	0.881348	39	-0.060707	0.542634	0.938887
Sphingobacteriaceae	39	0.00821815	0.688857	0.988368	39	-0.000354913	0.985016	0.989137	39	-5.89005e-05	0.997563	0.9994
Ruminococcaceae	39	0.0179367	0.737672	0.988368	39	-0.0179698	0.729111	0.927248	39	-0.0087919	0.860711	0.967678
Microbacteriaceae	39	-0.00325195	0.762315	0.988368	39	-0.00648628	0.57066	0.900951	39	-0.00693581	0.551715	0.938887
Phyllobacteriaceae	34	-0.000434373	0.771474	0.988368	34	-0.00022705	0.884974	0.969104	34	-0.000288519	0.856775	0.967678
Bacillaceae	39	-0.000559331	0.779167	0.988368	39	-0.0003926	0.847995	0.969104	39	-0.00045312	0.828246	0.967678
Porphyromonadaceae	39	-0.00334895	0.790794	0.988368	39	-0.00729809	0.595256	0.900951	39	-0.00598778	0.664426	0.947958
Erysipelotrichaceae	39	-0.00590053	0.793133	0.988368	39	-0.0175632	0.445052	0.881348	39	-0.0127193	0.556345	0.938887
Rhodobacteraceae	39	0.000806879	0.835257	0.988368	39	0.000218572	0.954543	0.989137	39	0.000571053	0.882399	0.967678
Micrococcaceae	39	0.000259002	0.843283	0.988368	39	-0.000166814	0.896471	0.969104	39	-0.000131227	0.920041	0.967678
Caldilineaceae	39	-0.0013735	0.84369	0.988368	39	-0.00514144	0.469328	0.881348	39	-0.00456429	0.524317	0.938887
Succinivibrionaceae	38	-0.0139679	0.850558	0.988368	38	-0.0242736	0.727637	0.927248	38	-0.0291715	0.679502	0.947958
Lachnospiraceae	39	-0.00612533	0.900911	0.988368	39	-0.0329186	0.487	0.881348	39	-0.0272312	0.563324	0.938887
Xanthomonadaceae	39	-0.00065387	0.910187	0.988368	39	0.000364438	0.951106	0.989137	39	-0.000327364	0.955976	0.987725
Clostridiaceae	39	-0.00318438	0.91424	0.988368	39	-0.0149447	0.631014	0.900951	39	-0.0129907	0.680498	0.947958
Comamonadaceae	39	-0.000785169	0.943845	0.993521	39	-0.00307237	0.797371	0.957058	39	-0.00167354	0.888463	0.967678
Heliobacteriaceae	39	-0.000168115	0.971327	0.993861	39	-0.000840078	0.863269	0.969104	39	-0.000743318	0.881287	0.967678
Elusimicrobiaceae	20	1.2023e-05	0.993861	0.993861	20	0.000961176	0.497691	0.884784	20	0.000875554	0.542475	0.938887

## Sheet: ST7
Supplementary Table 7. Association results from MaAsLin between all the bacteria at family level and testosterone (TESTO) levels.
	Unadjusted				Adjusted for stool consistency, read depth, day of menstrual cycle at sample collection, age				Adjusted for stool consistency, read depth, day of menstrual cycle at sample collection, age, BMI
Feature	N	Coefficient	P-value	Q-value	N	Coefficient	P-value	Q-value	N	Coefficient	P-value	Q-value
Xanthomonadaceae	39	0.000390755	0.00916356	0.366542	39	0.000390835	0.0162113	0.550882	39	0.000362569	0.031457	0.570833
Streptococcaceae	38	-0.000479029	0.0822095	0.720228	38	-0.000305804	0.31374	0.834308	38	-0.000232649	0.459232	0.874728
Alcaligenaceae	39	-0.00096472	0.0908571	0.720228	39	-6.26132e-05	0.907689	0.972448	39	0.000101843	0.85493	0.97615
Ruminococcaceae	39	-0.00226453	0.09617	0.720228	39	-0.000673246	0.650065	0.941732	39	4.22829e-05	0.97719	0.999792
Streptomycetaceae	39	-0.000291648	0.0995523	0.720228	39	-0.000307408	0.139572	0.674533	39	-0.000227486	0.278799	0.82492
Lachnospiraceae	39	-0.00201301	0.110137	0.720228	39	-0.000780037	0.565406	0.923112	39	-0.00034623	0.803778	0.958936
Turicibacteraceae	37	-0.000436138	0.145797	0.720228	37	-0.000126247	0.691171	0.942506	37	-0.000105365	0.752488	0.94836
Bifidobacteriaceae	39	-0.0021875	0.148043	0.720228	39	-0.00103638	0.532047	0.905612	39	-0.000879134	0.613569	0.924455
Lactobacillaceae	39	-0.00189121	0.162051	0.720228	39	-0.00117352	0.441884	0.876465	39	-0.000879247	0.580266	0.924455
Chitinophagaceae	39	-5.49896e-05	0.203414	0.773162	39	-5.75423e-05	0.20152	0.744073	39	-6.3314e-05	0.181073	0.76819
Succinivibrionaceae	38	0.00245167	0.21262	0.773162	38	0.00407724	0.0344108	0.550882	38	0.00399396	0.0481533	0.570833
Micrococcaceae	39	-4.17189e-05	0.232274	0.774247	39	-4.15079e-05	0.25305	0.812267	39	-4.15053e-05	0.277327	0.82492
Coriobacteriaceae	39	-0.000887879	0.253501	0.780004	39	-0.00018076	0.825034	0.972448	39	-0.000129073	0.880683	0.97615
Peptostreptococcaceae	38	-0.000387937	0.277462	0.792749	38	-0.000404069	0.297331	0.833328	38	-0.000337731	0.403599	0.832061
Elusimicrobiaceae	20	3.84811e-05	0.360496	0.871277	20	5.68748e-06	0.888881	0.972448	20	-1.64954e-06	0.969073	0.999792
Aerococcaceae	35	-8.19675e-05	0.364506	0.871277	35	3.16653e-05	0.754134	0.962725	35	9.05757e-05	0.359682	0.82492
Desulfovibrionaceae	39	0.000139562	0.370293	0.871277	39	0.00033469	0.0491625	0.550882	39	0.000359247	0.0443909	0.570833
Sinobacteraceae	37	-3.60366e-05	0.458085	0.949397	37	-5.10428e-05	0.321577	0.834308	37	-5.85093e-05	0.279116	0.82492
Porphyromonadaceae	39	-0.000231326	0.472378	0.949397	39	-9.51764e-05	0.809051	0.972448	39	1.07345e-05	0.979006	0.999792
Rivulariaceae	39	-7.72885e-05	0.474698	0.949397	39	-0.000117682	0.324618	0.834308	39	-0.000106407	0.395796	0.829796
Sphingobacteriaceae	39	0.000352482	0.521512	0.968454	39	0.0007081	0.184268	0.744073	39	0.00078443	0.161344	0.740595
Planococcaceae	39	1.69813e-05	0.53265	0.968454	39	1.66547e-05	0.598642	0.939046	39	-2.51669e-06	0.934169	0.994553
Caldilineaceae	39	9.4048e-05	0.608574	0.988032	39	0.000245003	0.224783	0.806877	39	0.00031416	0.131552	0.70952
Peptococcaceae	39	8.16028e-05	0.612563	0.988032	39	3.5393e-05	0.829417	0.972448	39	1.53451e-05	0.92905	0.994553
Flavobacteriaceae	39	-0.000110206	0.658448	0.988032	39	0.000146683	0.59051	0.932383	39	0.000194591	0.495476	0.889032
Coprobacillaceae	39	-0.00024949	0.700104	0.988032	39	0.000209265	0.778114	0.972448	39	0.000107374	0.890272	0.97615
Heliobacteriaceae	39	4.63362e-05	0.709165	0.988032	39	0.000118372	0.393868	0.836996	39	0.000135608	0.35252	0.82492
Prevotellaceae	39	0.000892532	0.725398	0.988032	39	0.00194396	0.493202	0.889249	39	0.0028744	0.32624	0.82492
Rhodobacteraceae	39	3.20488e-05	0.757657	0.988032	39	1.71302e-05	0.87593	0.972448	39	4.70492e-05	0.679204	0.927693
Erysipelotrichaceae	39	-0.000167504	0.776703	0.988032	39	7.25787e-05	0.912588	0.972448	39	0.00048784	0.443577	0.868542
Bacillaceae	39	1.06307e-05	0.846583	0.988032	39	-2.06448e-05	0.724508	0.950175	39	-2.68011e-05	0.663278	0.924455
Comamonadaceae	39	5.31945e-05	0.850978	0.988032	39	0.000191862	0.574553	0.925455	39	0.000322735	0.356073	0.82492
Enterobacteriaceae	39	0.000103959	0.866845	0.988032	39	0.000576751	0.383307	0.836996	39	0.000540581	0.436858	0.867076
Bacteroidaceae	39	-0.0001301	0.876443	0.988032	39	0.00119054	0.157966	0.702069	39	0.00134976	0.126593	0.708921
Clostridiaceae	39	0.000106918	0.887727	0.988032	39	0.000702581	0.428666	0.864537	39	0.000925513	0.316808	0.82492
Phyllobacteriaceae	34	3.46021e-06	0.932205	0.988032	34	-7.24784e-06	0.871801	0.972448	34	-1.26301e-05	0.788825	0.958936
Veillonellaceae	39	-8.8502e-05	0.946758	0.988032	39	0.0011407	0.410488	0.842026	39	0.00146787	0.309935	0.82492
Odoribacteraceae	39	1.19803e-05	0.964493	0.988032	39	0.000299492	0.282625	0.81907	39	0.000363911	0.211166	0.796269
Microbacteriaceae	39	1.05188e-05	0.971527	0.988032	39	0.00014541	0.657204	0.941732	39	0.000124334	0.718152	0.936982
Paraprevotellaceae	39	1.29017e-05	0.988032	0.988032	39	0.000780574	0.40046	0.836996	39	0.000868263	0.373832	0.82492

## Sheet: ST8
Supplementary Table 8. Association results from MaAsLin between all the bacteria at genus level and follicle stimulating hormone (FSH) levels.
	Unadjusted				Adjusted for stool consistency, read depth, day of menstrual cycle at sample collection, age				Adjusted for stool consistency, read depth, day of menstrual cycle at sample collection, age, BMI
Feature	N	Coefficient	P-value	Q-value	N	Coefficient	P-value	Q-value	N	Coefficient	P-value	Q-value
Eubacterium	38	0.0171077	0.000399843	0.0231909	38	0.0166216	0.00124799	0.168588	38	0.0150632	0.00135945	0.182057
Pseudobutyrivibrio	39	0.00398627	0.0311623	0.517955	39	0.00392921	0.0412442	0.639109	39	0.00339867	0.0597198	0.716249
Lactobacillus	39	0.02447	0.0340734	0.517955	39	0.0232139	0.0570953	0.639109	39	0.0221547	0.0734039	0.716249
Kitasatospora	39	0.00363172	0.0357211	0.517955	39	0.00338357	0.0619789	0.639109	39	0.00304989	0.0876579	0.716249
Roseburia	39	0.0134119	0.0786197	0.777712	39	0.0128235	0.0768869	0.639109	39	0.0118538	0.10298	0.716249
Elusimicrobium	20	-0.000643931	0.0806748	0.777712	20	-0.000579714	0.0759605	0.639109	20	-0.000559627	0.0926741	0.716249
Collinsella	39	0.00877197	0.102909	0.777712	39	0.00850721	0.119921	0.687955	39	0.0079743	0.150008	0.716249
Alkalibacterium	35	0.00135494	0.112337	0.777712	35	0.00105041	0.201213	0.690747	35	0.000854613	0.27993	0.76683
Coprococcus	39	0.00572117	0.130837	0.777712	39	0.00493075	0.170435	0.690747	39	0.0046152	0.206167	0.716249
Dorea	36	0.00404157	0.140556	0.777712	36	0.00344082	0.208878	0.690747	36	0.00278079	0.290617	0.76683
Bifidobacterium	39	0.0189974	0.147497	0.777712	39	0.0163386	0.224993	0.711797	39	0.0157225	0.253036	0.76683
Anoxybacillus	29	-0.000439653	0.178272	0.861647	29	-0.000504738	0.138965	0.690747	29	-0.000476734	0.168894	0.716249
Paracoccus	30	-0.000649054	0.233052	0.943253	30	-0.000778698	0.120212	0.687955	30	-0.000722951	0.152964	0.716249
Phascolarctobacterium	36	-0.00068498	0.299642	0.943253	36	-0.000844131	0.171332	0.690747	36	-0.000898025	0.153172	0.716249
Megasphaera	39	0.0106418	0.377008	0.943253	39	0.0111648	0.378489	0.859145	39	0.0103516	0.423232	0.895217
Ruminococcus	39	0.00605438	0.389951	0.943253	39	0.00437813	0.521964	0.928312	39	0.0028833	0.665225	0.924311
Escherichia	39	0.00427786	0.394848	0.943253	39	0.00460582	0.365773	0.856427	39	0.00487697	0.348979	0.832256
Calothrix	39	-0.000796296	0.398728	0.943253	39	-0.000852817	0.385134	0.859145	39	-0.000942339	0.345688	0.832256
Oribacterium	38	-0.00223275	0.40444	0.943253	38	-0.00336291	0.229963	0.714528	38	-0.00396735	0.149346	0.716249
Paraprevotella	37	0.0014888	0.42083	0.943253	37	0.000627089	0.707898	0.966073	37	0.000136125	0.930688	0.973864
Sutterella	39	0.00415984	0.42632	0.943253	39	0.00283578	0.520507	0.928312	39	0.00224501	0.612939	0.91227
Lachnospira	39	0.00410083	0.426603	0.943253	39	0.00321176	0.503425	0.928312	39	0.00272123	0.575815	0.91227
Catenibacterium	39	0.00440965	0.456587	0.943253	39	0.00233762	0.702026	0.964835	39	0.00283485	0.648766	0.922138
Natronincola	38	0.00218829	0.458524	0.943253	38	0.00176619	0.524525	0.928312	38	0.00134227	0.62864	0.91227
Blautia	39	0.00446641	0.463528	0.943253	39	0.00376859	0.544013	0.934506	39	0.00373451	0.557277	0.91227
Bacteroides	39	0.00528913	0.479149	0.943253	39	0.00473606	0.498936	0.928312	39	0.00454773	0.525871	0.899272
Faecalibacterium	39	-0.0071931	0.496869	0.943253	39	-0.00990687	0.341539	0.842948	39	-0.0125549	0.210923	0.716249
Oscillospira	39	0.0057524	0.507781	0.943253	39	0.00241818	0.761184	0.970791	39	0.00124399	0.876057	0.964494
Streptococcus	38	0.00156883	0.525385	0.943253	38	0.00145123	0.562674	0.934506	38	0.00111717	0.657754	0.922138
Erysipelothrix	39	0.00189967	0.535672	0.943253	39	0.000277705	0.92765	0.982025	39	-0.000364467	0.903254	0.970148
Stenotrophomonas	30	-0.000308116	0.555974	0.943253	30	-0.000245381	0.641627	0.938177	30	-0.000172532	0.744657	0.938916
Odoribacter	38	0.000904635	0.583946	0.943253	38	0.00077709	0.639532	0.938177	38	0.000660489	0.696124	0.930232
Negativicoccus	38	0.00167973	0.613015	0.943253	38	0.00187183	0.581536	0.934506	38	0.00149234	0.663947	0.924311
Dialister	23	-0.000204514	0.621398	0.943253	23	-0.000228191	0.572624	0.934506	23	-0.000237634	0.566227	0.91227
Butyrivibrio	36	-0.00145822	0.622618	0.943253	36	-0.00263038	0.369033	0.856427	36	-0.00282535	0.344715	0.832256
Bacillus	39	-0.000230675	0.624519	0.943253	39	-0.000333963	0.48131	0.928312	39	-0.000364367	0.451867	0.895217
Polaribacter	39	0.000718275	0.649985	0.943253	39	0.000415858	0.804391	0.980884	39	0.000277905	0.870809	0.963348
Slackia	39	0.00151496	0.671911	0.943253	39	0.000818811	0.816579	0.980884	39	0.000803278	0.824247	0.960668
Sphingobacterium	39	-0.00212644	0.677179	0.943253	39	-0.00423994	0.365162	0.856427	39	-0.00436722	0.362442	0.855531
Turicibacter	37	0.00108344	0.681738	0.943253	37	0.000255089	0.922267	0.982025	37	0.000145894	0.956488	0.978172
Dysgonomonas	39	0.00106678	0.701468	0.943253	39	0.000918939	0.762713	0.970791	39	0.000715941	0.817608	0.960668
Atopobium	36	0.00131394	0.712079	0.943253	36	-3.58853e-05	0.992054	0.999322	36	-0.000412987	0.91	0.970148
Phyllobacterium	28	-9.99331e-05	0.716008	0.943253	28	-0.000118518	0.694033	0.958513	28	-0.000131918	0.668623	0.924311
Caldilinea	39	0.00057925	0.722473	0.943253	39	1.67316e-06	0.999205	0.999322	39	-0.000191585	0.91019	0.970148
Chitinophaga	27	0.000152033	0.7537	0.943253	27	4.2905e-05	0.928898	0.982025	27	9.6973e-05	0.842099	0.960668
Parabacteroides	37	0.000772637	0.763138	0.943253	37	0.000582587	0.804572	0.980884	37	0.000259263	0.912799	0.970148
Olsenella	25	0.000676632	0.770236	0.943253	25	0.000162414	0.943699	0.982025	25	0.000308496	0.895448	0.970148
Clostridium	39	0.00137782	0.795796	0.943253	39	0.000440497	0.938605	0.982025	39	-0.000252534	0.96513	0.980927
Heliorestis	39	0.000272995	0.80367	0.943253	39	0.000115765	0.920015	0.982025	39	8.73138e-05	0.941041	0.97465
Veillonella	38	-0.00041563	0.81768	0.943253	38	-0.000443806	0.790027	0.978732	38	-0.000800608	0.623987	0.91227
Succinivibrio	38	0.00376017	0.829625	0.943253	38	0.00744425	0.650638	0.945357	38	0.00904163	0.588261	0.91227
Prevotella	39	0.00444511	0.845675	0.943253	39	-0.00188848	0.937438	0.982025	39	-0.00471545	0.846325	0.960668
Desulfovibrio	39	-0.000116911	0.9143	0.990197	39	-0.000340751	0.766588	0.970791	39	-0.000394459	0.736872	0.937837
Sarcina	36	0.000199407	0.9411	0.990197	36	-0.000580172	0.836347	0.982025	36	-0.000814558	0.775746	0.941077
Flavobacterium	39	-0.000124112	0.950916	0.990197	39	-0.000341607	0.853432	0.982025	39	-0.000232314	0.90207	0.970148
Micrococcus	15	-1.15941e-05	0.956053	0.990197	15	5.65761e-05	0.77391	0.970791	15	8.07415e-05	0.684934	0.929216
Mitsuokella	30	-0.000117361	0.982224	0.994419	30	0.000350275	0.94534	0.982025	30	0.00105374	0.837577	0.960668
Alkaliphilus	39	2.36844e-05	0.994419	0.994419	39	-0.000791967	0.825231	0.980884	39	-0.0010489	0.774292	0.941077

## Sheet: ST9
Supplementary Table 9. Association results from MaAsLin between all the bacteria at genus level and lutenising hormone (LH) to follicle stimulating hormone (FSH) ratio (LH/FSH).
	Unadjusted				Adjusted for stool consistency, read depth, day of menstrual cycle at sample collection, age				Adjusted for stool consistency, read depth, day of menstrual cycle at sample collection, age, BMI
Feature	N	Coefficient	P-value	Q-value	N	Coefficient	P-value	Q-value	N	Coefficient	P-value	Q-value
Micrococcus	15	-0.00223364	0.00841027	0.487796	15	-0.00180061	0.0269602	0.586384	15	-0.00189318	0.020332	0.476548
Lactobacillus	39	-0.0947539	0.0578555	0.986602	39	-0.123114	0.0168799	0.451863	39	-0.119602	0.0215875	0.476548
Paracoccus	30	0.00422668	0.064605	0.986602	30	0.00431256	0.0421459	0.588375	30	0.00413088	0.052908	0.650928
Anoxybacillus	29	0.00211609	0.119734	0.986602	29	0.00193566	0.187718	0.633833	29	0.00183609	0.216795	0.694441
Escherichia	39	-0.0292033	0.168226	0.986602	39	-0.0292498	0.177393	0.633833	39	-0.0301614	0.172212	0.690172
Bacteroides	39	-0.0438796	0.169102	0.986602	39	-0.0634925	0.0289094	0.588375	39	-0.063232	0.0329694	0.625773
Bifidobacterium	39	-0.072261	0.202274	0.986602	39	-0.108762	0.0555538	0.588375	39	-0.106921	0.0645019	0.690172
Collinsella	39	-0.0289724	0.215103	0.986602	39	-0.0425089	0.0682508	0.633833	39	-0.0407271	0.0833048	0.690172
Dialister	23	0.00206746	0.240108	0.986602	23	0.00230954	0.178229	0.633833	23	0.00234995	0.179514	0.690172
Mitsuokella	30	-0.0260335	0.247348	0.986602	30	-0.0329502	0.125849	0.633833	30	-0.0355291	0.0985885	0.690172
Calothrix	39	0.00460798	0.254779	0.986602	39	0.00540202	0.196707	0.633833	39	0.0056983	0.179226	0.690172
Chitinophaga	27	-0.00208995	0.306089	0.986602	27	-0.00225941	0.268989	0.728546	27	-0.00245416	0.233227	0.696251
Sutterella	39	0.0222281	0.318413	0.986602	39	0.00720203	0.704387	0.941823	39	0.00934079	0.622688	0.909022
Desulfovibrio	39	-0.0044299	0.322145	0.986602	39	-0.00597574	0.219992	0.677499	39	-0.00587667	0.236928	0.702138
Butyrivibrio	36	0.0111829	0.37894	0.986602	36	0.0034761	0.783332	0.951503	36	0.00400083	0.755962	0.938323
Megasphaera	39	-0.0435856	0.401045	0.986602	39	-0.0571039	0.292698	0.75303	39	-0.0544084	0.323753	0.79183
Paraprevotella	37	0.0063073	0.421085	0.986602	37	0.000232378	0.974222	0.997963	37	0.00186203	0.780761	0.938323
Catenibacterium	39	0.0203921	0.422042	0.986602	39	0.0109284	0.676816	0.932812	39	0.0095441	0.720131	0.926431
Lachnospira	39	0.0166934	0.450799	0.986602	39	0.00233452	0.910091	0.988873	39	0.00412165	0.843292	0.957201
Negativicoccus	38	-0.0105598	0.458452	0.986602	38	-0.0131109	0.366483	0.80754	38	-0.0119034	0.416008	0.837285
Eubacterium	38	-0.0164824	0.459838	0.986602	38	-0.0260576	0.272158	0.728546	38	-0.0203543	0.34768	0.811254
Polaribacter	39	-0.00423969	0.529892	0.986602	39	-0.00659854	0.356872	0.801236	39	-0.00619128	0.394241	0.820442
Alkalibacterium	35	0.00218966	0.557807	0.986602	35	-0.000500426	0.888609	0.988873	35	0.000186813	0.956381	0.992662
Prevotella	39	-0.0553279	0.570122	0.986602	39	-0.0901008	0.380045	0.80754	39	-0.0818844	0.429149	0.84628
Roseburia	39	-0.0186329	0.577693	0.986602	39	-0.0272123	0.390715	0.80754	39	-0.0236351	0.45493	0.847171
Bacillus	39	0.00109201	0.57923	0.986602	39	0.000762735	0.708659	0.941823	39	0.000850762	0.682292	0.917253
Streptococcus	38	-0.00588891	0.580628	0.986602	38	-0.0108894	0.308845	0.756889	38	-0.00983083	0.359532	0.820442
Odoribacter	38	-0.00377533	0.596404	0.986602	38	-0.00685552	0.332962	0.769247	38	-0.00650062	0.366208	0.820442
Dorea	36	-0.00569562	0.634801	0.986602	36	-0.0133695	0.256363	0.712164	36	-0.0111696	0.321534	0.791168
Turicibacter	37	-0.00533133	0.637536	0.986602	37	-0.0123442	0.266609	0.728546	37	-0.0120938	0.285838	0.775461
Olsenella	25	0.00462836	0.639003	0.986602	25	0.000586799	0.952596	0.995505	25	0.000126912	0.989917	0.992662
Phascolarctobacterium	36	0.00125435	0.661646	0.986602	36	0.000194991	0.942171	0.991656	36	0.000326446	0.904954	0.980237
Oscillospira	39	0.0159843	0.669902	0.986602	39	-0.00812723	0.811943	0.96073	39	-0.00426317	0.900557	0.980237
Pseudobutyrivibrio	39	-0.00308997	0.707312	0.986602	39	-0.00539112	0.526437	0.902464	39	-0.0035092	0.658267	0.916658
Phyllobacterium	28	0.000428341	0.711236	0.986602	28	0.000397929	0.758395	0.948873	28	0.000438854	0.739345	0.932482
Stenotrophomonas	30	0.000829063	0.713823	0.986602	30	0.00194511	0.38803	0.80754	30	0.00171399	0.447623	0.847171
Sarcina	36	0.00392354	0.715766	0.986602	36	-0.000858944	0.943213	0.991656	36	-0.000137449	0.991039	0.992662
Ruminococcus	39	0.0108594	0.719756	0.986602	39	-0.00680367	0.817173	0.96073	39	-0.00178087	0.950251	0.992662
Atopobium	36	0.00470261	0.759105	0.986602	36	-0.00407256	0.792186	0.951503	36	-0.00288918	0.853293	0.957201
Oribacterium	38	-0.00309444	0.789661	0.986602	38	-0.0065079	0.591725	0.917024	38	-0.00478848	0.688757	0.921817
Parabacteroides	37	-0.00236337	0.830894	0.986602	37	-0.00832437	0.407772	0.823522	37	-0.00732286	0.467711	0.847171
Coprococcus	39	-0.00350578	0.832141	0.986602	39	-0.015054	0.333109	0.769247	39	-0.0139083	0.376273	0.820442
Sphingobacterium	39	0.00440471	0.841707	0.986602	39	-0.0060827	0.763461	0.948873	39	-0.00595533	0.772901	0.938323
Caldilinea	39	-0.00138121	0.844329	0.986602	39	-0.0051623	0.471938	0.879955	39	-0.00458408	0.526724	0.876434
Succinivibrio	38	-0.0143921	0.847837	0.986602	38	-0.0245086	0.728477	0.941823	38	-0.0295277	0.679664	0.916756
Veillonella	38	0.00128238	0.869102	0.986602	38	-0.00194846	0.785331	0.951503	38	-0.000832639	0.905297	0.980237
Kitasatospora	39	-0.00122318	0.873519	0.986602	39	-0.00303362	0.704124	0.941823	39	-0.00179757	0.818161	0.955046
Clostridium	39	-0.00352156	0.878033	0.986602	39	-0.0109812	0.654112	0.925329	39	-0.00881251	0.721064	0.926431
Flavobacterium	39	-0.00110441	0.898654	0.986602	39	-0.00641973	0.416263	0.825592	39	-0.00685406	0.393254	0.820442
Dysgonomonas	39	-0.00133549	0.907458	0.986602	39	-0.00286977	0.826181	0.964802	39	-0.0021888	0.869096	0.963211
Alkaliphilus	39	-0.00155913	0.914825	0.986602	39	-0.00667424	0.664242	0.927431	39	-0.00594638	0.703735	0.924649
Faecalibacterium	39	0.00469944	0.914931	0.986602	39	-0.0162476	0.717944	0.941823	39	-0.00833881	0.847858	0.957201
Natronincola	38	-0.00082172	0.948659	0.986602	38	-0.00810974	0.495792	0.883135	38	-0.00671605	0.57128	0.906014
Erysipelothrix	39	-0.000740713	0.955372	0.986602	39	-0.00851119	0.515352	0.896713	39	-0.00649281	0.611966	0.908062
Slackia	39	0.000727381	0.962286	0.986602	39	-0.00708317	0.639714	0.925329	39	-0.00705628	0.647882	0.916658
Blautia	39	-0.00121308	0.963332	0.986602	39	-0.0146515	0.582788	0.917024	39	-0.0144781	0.594946	0.908062
Heliorestis	39	-0.000180697	0.969591	0.986602	39	-0.000834174	0.866106	0.980693	39	-0.000743549	0.882916	0.968821
Elusimicrobium	20	7.2188e-06	0.996348	0.996348	20	0.000967231	0.499443	0.883135	20	0.000880098	0.544532	0.892676

[truncated: 4 more sheets: ST10, ST11, ST12, ST13]
